# Supplementary material for: DeepARG: a deep learning approach for predicting antibiotic resistance genes from metagenomic data
Source: PubMed Central journal article supplement (PMC5796597; doi:10.1186/s40168-018-0401-z), 2018-02-01
Supplement: 40168_2018_401_MOESM1_ESM.pdf [file 40168_2018_401_MOESM1_ESM.pdf]

| <b>Antibiotic</b> | <b>Antibiotic class</b> |
|-------------------|-------------------------|
| 6_n_netilmicin    | aminoglycoside          |
| acriflavin        | acriflavin              |
| acriflavine       | acriflavine             |
| amikacin          | aminoglycoside          |
| aminocoumarin     | aminocoumarin           |
| aminoglycoside    | aminoglycoside          |
| apramycin         | aminoglycoside          |
| astromicin        | aminoglycoside          |
| bacitracin        | bacitracin              |
| beta_lactam       | beta_lactam             |
| bleomycin         | bleomycin               |
| butirosin         | aminoglycoside          |
| carbapenem        | beta_lactam             |
| carbenicillin     | beta_lactam             |
| cefoxitin         | beta_lactam             |
| ceftazidime       | beta_lactam             |
| ceftriaxone       | beta_lactam             |
| cephalosporin     | beta_lactam             |
| cephalosporin_i   | beta_lactam             |
| cephalosporin_ii  | beta_lactam             |
| cephalosporin_iii | beta_lactam             |
| cephamycin        | beta_lactam             |
| chloramphenicol   | chloramphenicol         |
| ciprofloxacin     | quinolone               |
| cloxacillin       | beta_lactam             |
| deoxycholate      | deoxycholate            |
| dibekacin         | aminoglycoside          |
| doxorubicin       | doxorubicin             |
| e_cephalosporin   | beta_lactam             |
| e_penicillin      | beta_lactam             |
| efflux            | multidrug               |

|                 |                                     |
|-----------------|-------------------------------------|
| elfamycin       | elfamycin                           |
| enoxacin        | quinolone                           |
| erythromycin    | macrolide-lincosamide-streptogramin |
| ethambutol      | ethambutol                          |
| fluoramphenicol | fluoramphenicol                     |
| fluoroquinolone | quinolone                           |
| fosfomycin      | fosfomycin                          |
| fosmidomycin    | fosmidomycin                        |
| fusaric_acid    | fusaric_acid                        |
| fusidic acid    | fusidic_acid                        |
| fusidic_acid    | fusidic_acid                        |
| gentamicin      | aminoglycoside                      |
| gentamicin_b    | aminoglycoside                      |
| gentamincin_b   | aminoglycoside                      |
| glycopeptide    | glycopeptide                        |
| glycylcycline   | tetracycline                        |
| hygromycin_b    | aminoglycoside                      |
| isepamicin      | aminoglycoside                      |
| isoniazid       | isoniazid                           |
| kanamycin       | aminoglycoside                      |
| kasugamycin     | kasugamycin                         |
| lincomycin      | macrolide-lincosamide-streptogramin |
| lincosamide     | macrolide-lincosamide-streptogramin |
| linezolid       | linezolid                           |
| lipopeptide     | lipopeptide                         |
| lividomycin     | aminoglycoside                      |
| macrolide       | macrolide-lincosamide-streptogramin |
| methicillin     | beta_lactam                         |
| monobactam      | beta_lactam                         |
| multidrug       | multidrug                           |
| mupirocin       | mupirocin                           |
| n_cephalosporin | beta_lactam                         |

|                   |                                     |
|-------------------|-------------------------------------|
| na_antimicrobials | multidrug                           |
| neomycin          | aminoglycoside                      |
| netilmicin        | aminoglycoside                      |
| nitrofuratoin     | nitrofuratoin                       |
| norfloxacin       | quinolone                           |
| paromomycin       | aminoglycoside                      |
| penicillin        | beta_lactam                         |
| peptide           | peptide                             |
| phenicol          | phenicol                            |
| pleuromutilin     | pleuromutilin                       |
| polyamine         | polyamine                           |
| polymyxin         | polymyxin                           |
| puromycin         | puromycin                           |
| pyrazinamide      | pyrazinamide                        |
| qa_compound       | qa_compound                         |
| ribostamycin      | aminoglycoside                      |
| rifampin          | rifampin                            |
| roxithromycin     | roxithromycin                       |
| sisomicin         | aminoglycoside                      |
| spectinomycin     | aminoglycoside                      |
| spectomycin       | aminoglycoside                      |
| streptogramin     | macrolide-lincosamide-streptogramin |
| streptogramin_a   | macrolide-lincosamide-streptogramin |
| streptogramin_b   | macrolide-lincosamide-streptogramin |
| streptomycin      | aminoglycoside                      |
| streptothricin    | streptothricin                      |
| sulfonamide       | sulfonamide                         |
| t_chloride        | t_chloride                          |
| teicoplanin       | glycopeptide                        |
| tetracenomycin_c  | tetracenomycin                      |
| tetracycline      | tetracycline                        |
| thiostrepton      | thiostrepton                        |

|              |                |
|--------------|----------------|
| tigecycline  | tetracycline   |
| tobramycin   | aminoglycoside |
| triclosan    | triclosan      |
| trimethoprim | trimethoprim   |
| tunicamycin  | tunicamycin    |
| vancomycin   | glycopeptide   |
| viomycin     | viomycin       |
| novobiocin   | aminocoumarin  |

□

**Table S1:** Detected antibiotic names from the CARD and ARDB databases. Each antibiotic is grouped by the class of antibiotics.
