# Supplementary material for: DeepARG: a deep learning approach for predicting antibiotic resistance genes from metagenomic data
Source: PubMed Central journal article supplement (PMC5796597; doi:10.1186/s40168-018-0401-z), 2018-02-01
Supplement: 40168_2018_401_MOESM2_ESM.pdf [file 40168_2018_401_MOESM2_ESM.pdf]

Deep Learning Training performance

|                                     | <b>precision</b> | <b>recall</b> | <b>f1-score</b> |
|-------------------------------------|------------------|---------------|-----------------|
| aminocoumarin                       | 0.99             | 1             | 0.99            |
| aminoglycoside                      | 1                | 0.99          | 0.99            |
| bacitracin                          | 1                | 0.96          | 0.98            |
| beta_lactam                         | 0.99             | 0.99          | 0.99            |
| chloramphenicol                     | 1                | 0.97          | 0.99            |
| elfamycin                           | 1                | 1             | 1               |
| fosfomycin                          | 1                | 1             | 1               |
| fosmidomycin                        | 0.68             | 1             | 0.81            |
| fusidic_acid                        | 0.9              | 1             | 0.95            |
| glycopeptide                        | 0.99             | 1             | 1               |
| kasugamycin                         | 1                | 1             | 1               |
| macrolide-lincosamide-streptogramin | 1                | 1             | 1               |
| multidrug                           | 0.65             | 0.99          | 0.79            |
| mupirocin                           | 1                | 1             | 1               |
| nitrofuratoin                       | 1                | 1             | 1               |
| peptide                             | 1                | 0.98          | 0.99            |
| polymyxin                           | 1                | 0.41          | 0.58            |
| puromycin                           | 1                | 1             | 1               |
| trimethoprim                        | 1                | 1             | 1               |
| qa_compound                         | 1                | 1             | 1               |
| quinolone                           | 1                | 0.92          | 0.96            |
| rifampin                            | 1                | 1             | 1               |
| streptothricin                      | 1                | 1             | 1               |
| sulfonamide                         | 1                | 1             | 1               |
| tetracenomycin                      | 1                | 1             | 1               |
| tetracycline                        | 1                | 0.99          | 0.99            |
| thiostrepton                        | 1                | 1             | 1               |
| triclosan                           | 0.99             | 1             | 1               |
| tunicamycin                         | 1                | 1             | 1               |
| unclassified                        | 0                | 0             | 0               |
| unknown                             | 0.89             | 0.43          | 0.58            |
| avg/total                           | 0.95             | 0.93          | 0.93            |

Performance of the Deep Learning with the test dataset

|                 | <b>precision</b> | <b>recall</b> | <b>f1-score</b> |
|-----------------|------------------|---------------|-----------------|
| aminocoumarin   | 0                | 0             | 0               |
| aminoglycoside  | 1                | 1             | 1               |
| bacitracin      | 1                | 0.95          | 0.98            |
| beta_lactam     | 0.99             | 1             | 1               |
| chloramphenicol | 1                | 1             | 1               |
| fosfomycin      | 1                | 1             | 1               |
| fosmidomycin    | 1                | 1             | 1               |
| glycopeptide    | 0.92             | 1             | 0.96            |

|                                     |      |      |      |
|-------------------------------------|------|------|------|
| macrolide-lincosamide-streptogramin | 1    | 1    | 1    |
| multidrug                           | 0.27 | 0.99 | 0.43 |
| mupirocin                           | 1    | 1    | 1    |
| peptide                             | 1    | 0.99 | 0.99 |
| polymyxin                           | 1    | 0.41 | 0.58 |
| trimethoprim                        | 0.86 | 1    | 0.92 |
| quinolone                           | 0.93 | 0.74 | 0.82 |
| tetracycline                        | 1    | 1    | 1    |
| triclosan                           | 0    | 0    | 0    |
| unknown                             | 0.87 | 0.42 | 0.57 |
| avg/total                           | 0.97 | 0.91 | 0.91 |

Best Hit training performance

|                                     | <b>precision</b> | <b>recall</b> | <b>f1-score</b> |
|-------------------------------------|------------------|---------------|-----------------|
| aminocoumarin                       | 0.98             | 1             | 0.99            |
| aminoglycoside                      | 1                | 0.89          | 0.94            |
| bacitracin                          | 1                | 0.62          | 0.76            |
| beta_lactam                         | 1                | 0.86          | 0.92            |
| chloramphenicol                     | 1                | 0.7           | 0.82            |
| elfamycin                           | 1                | 1             | 1               |
| fosfomycin                          | 1                | 0.79          | 0.88            |
| fosmidomycin                        | 0.78             | 0.96          | 0.86            |
| fusidic_acid                        | 0.89             | 0.86          | 0.88            |
| glycopeptide                        | 1                | 0.99          | 0.99            |
| kasugamycin                         | 1                | 1             | 1               |
| macrolide-lincosamide-streptogramin | 1                | 0.74          | 0.85            |
| multidrug                           | 0.87             | 0.9           | 0.88            |
| mupirocin                           | 1                | 0.77          | 0.87            |
| nitrofuratoin                       | 1                | 1             | 1               |
| peptide                             | 0.98             | 0.3           | 0.46            |
| polymyxin                           | 0.88             | 0.63          | 0.73            |
| puromycin                           | 1                | 1             | 1               |
| trimethoprim                        | 1                | 1             | 1               |
| qa_compound                         | 1                | 1             | 1               |
| quinolone                           | 0.98             | 0.88          | 0.93            |
| rifampin                            | 1                | 1             | 1               |
| streptothricin                      | 1                | 1             | 1               |
| sulfonamide                         | 1                | 1             | 1               |
| tetracenomycin                      | 1                | 1             | 1               |
| tetracycline                        | 1                | 0.99          | 0.99            |
| thiostrepton                        | 1                | 1             | 1               |
| triclosan                           | 1                | 1             | 1               |
| tunicamycin                         | 1                | 1             | 1               |
| unknown                             | 0.3              | 0.11          | 0.16            |
| avg/total                           | 0.97             | 0.77          | 0.85            |

Performance of Best Hit with the test dataset

|                                     | precision | 80% identity<br>recall | f1-score |
|-------------------------------------|-----------|------------------------|----------|
| aminoglycoside                      | 1         | 0.75                   | 0.86     |
| bacitracin                          | 1         | 0.36                   | 0.53     |
| beta_lactam                         | 1         | 0.7                    | 0.82     |
| chloramphenicol                     | 1         | 0.44                   | 0.62     |
| fosfomycin                          | 1         | 0.45                   | 0.62     |
| fosmidomycin                        | 1         | 0.33                   | 0.5      |
| glycopeptide                        | 1         | 0.17                   | 0.29     |
| macrolide-lincosamide-streptogramin | 1         | 0.55                   | 0.71     |
| multidrug                           | 0.44      | 0.44                   | 0.44     |
| mupirocin                           | 1         | 0.1                    | 0.18     |
| peptide                             | 0.99      | 0.2                    | 0.33     |
| polymyxin                           | 0.85      | 0.41                   | 0.56     |
| trimethoprim                        | 1         | 1                      | 1        |
| quinolone                           | 0.92      | 0.11                   | 0.2      |
| tetracycline                        | 1         | 0.5                    | 0.67     |
| unknown                             | 0.13      | 0.02                   | 0.04     |
| avg/total                           | 0.96      | 0.51                   | 0.65     |

□

**Table S2:** Prediction performance of the individual ARG categories for the deepARG-SS model and the Best Hit approach using the UNIPROT 70% genes for training and 30% for validation, where, genes are splitted into 100nt long kmers to simulate next generation short sequences.
