# Supplementary material for: DeepARG: a deep learning approach for predicting antibiotic resistance genes from metagenomic data
Source: PubMed Central journal article supplement (PMC5796597; doi:10.1186/s40168-018-0401-z), 2018-02-01
Supplement: 40168_2018_401_MOESM3_ESM.pdf [file 40168_2018_401_MOESM3_ESM.pdf]

### Deep learning training performance

|                                     | precision | recall | f1-score |
|-------------------------------------|-----------|--------|----------|
| aminocoumarin                       | 0.8       | 0.57   | 0.67     |
| aminoglycoside                      | 0.96      | 0.99   | 0.98     |
| bacitracin                          | 0.99      | 1      | 1        |
| beta_lactam                         | 1         | 1      | 1        |
| chloramphenicol                     | 1         | 1      | 1        |
| elfamycin                           | 1         | 0.6    | 0.75     |
| fosfomycin                          | 1         | 1      | 1        |
| fosmidomycin                        | 0.71      | 1      | 0.83     |
| fusidic_acid                        | 1         | 0.6    | 0.75     |
| glycopeptide                        | 0.99      | 0.96   | 0.98     |
| kasugamycin                         | 1         | 1      | 1        |
| macrolide-lincosamide-streptogramin | 1         | 0.99   | 0.99     |
| multidrug                           | 0.95      | 0.85   | 0.9      |
| mupirocin                           | 0.2       | 0.75   | 0.32     |
| nitrofuratoin                       | 0         | 0      | 0        |
| peptide                             | 0.99      | 0.98   | 0.99     |
| polymyxin                           | 0.89      | 0.99   | 0.94     |
| puromycin                           | 0         | 0      | 0        |
| trimethoprim                        | 1         | 0.99   | 0.99     |
| qa_compound                         | 1         | 1      | 1        |
| quinolone                           | 0.98      | 0.89   | 0.93     |
| rifampin                            | 1         | 1      | 1        |
| streptothricin                      | 1         | 0.33   | 0.5      |
| sulfonamide                         | 1         | 1      | 1        |
| tetracenomycin                      | 1         | 1      | 1        |
| tetracycline                        | 0.99      | 0.97   | 0.98     |
| thiostrepton                        | 0.8       | 1      | 0.89     |
| triclosan                           | 1         | 0.75   | 0.86     |
| tunicamycin                         | 0         | 0      | 0        |
| unknown                             | 0.93      | 0.86   | 0.89     |
| avg/total                           | 0.98      | 0.98   | 0.98     |

### Performance of the Deep Learning with the test dataset

|                                     | precision | recall | f1-score |
|-------------------------------------|-----------|--------|----------|
| aminoglycoside                      | 1         | 1      | 1        |
| bacitracin                          | 1         | 1      | 1        |
| beta_lactam                         | 1         | 1      | 1        |
| chloramphenicol                     | 0.99      | 1      | 1        |
| fosfomycin                          | 1         | 1      | 1        |
| macrolide-lincosamide-streptogramin | 1         | 1      | 1        |
| multidrug                           | 0.92      | 0.56   | 0.7      |

|              |      |      |      |
|--------------|------|------|------|
| mupirocin    | 0    | 0    | 0    |
| peptide      | 1    | 0.98 | 0.99 |
| polymyxin    | 0.91 | 1    | 0.95 |
| trimethoprim | 1    | 1    | 1    |
| quinolone    | 0.89 | 0.8  | 0.84 |
| sulfonamide  | 0    | 0    | 0    |
| tetracycline | 0    | 0    | 0    |
| unclassified | 0    | 0    | 0    |
| unknown      | 0.95 | 0.78 | 0.86 |
| avg/total    | 0.99 | 0.99 | 0.99 |

#### Best Hit training performance

|                                     | precision | recall | f1-score |
|-------------------------------------|-----------|--------|----------|
| aminocoumarin                       | 1         | 1      | 1        |
| aminoglycoside                      | 1         | 0.51   | 0.67     |
| bacitracin                          | 1         | 0.31   | 0.47     |
| beta_lactam                         | 1         | 0.59   | 0.74     |
| chloramphenicol                     | 1         | 0.42   | 0.59     |
| elfamycin                           | 1         | 1      | 1        |
| fosfomycin                          | 1         | 0.58   | 0.73     |
| fosmidomycin                        | 1         | 0.94   | 0.97     |
| fusidic_acid                        | 0.67      | 0.4    | 0.5      |
| glycopeptide                        | 1         | 0.83   | 0.91     |
| kasugamycin                         | 1         | 1      | 1        |
| macrolide-lincosamide-streptogramin | 1         | 0.44   | 0.61     |
| multidrug                           | 0.89      | 0.88   | 0.88     |
| mupirocin                           | 1         | 0.25   | 0.4      |
| nitrofuratoin                       | 1         | 1      | 1        |
| peptide                             | 0.97      | 0.06   | 0.11     |
| polymyxin                           | 0.99      | 0.41   | 0.58     |
| puromycin                           | 1         | 1      | 1        |
| trimethoprim                        | 1         | 0.99   | 0.99     |
| qa_compound                         | 1         | 1      | 1        |
| quinolone                           | 0.99      | 0.88   | 0.93     |
| rifampin                            | 1         | 1      | 1        |
| streptothricin                      | 1         | 1      | 1        |
| sulfonamide                         | 1         | 0.95   | 0.98     |
| tetracenomycin                      | 1         | 1      | 1        |
| tetracycline                        | 1         | 0.9    | 0.95     |
| thiostrepton                        | 1         | 1      | 1        |
| triclosan                           | 1         | 1      | 1        |
| tunicamycin                         | 1         | 1      | 1        |
| unknown                             | 0.75      | 0.08   | 0.14     |
| avg/total                           | 0.99      | 0.49   | 0.63     |

Performance of Best Hit with the test dataset

|                                     | precision | recall | f1-score |
|-------------------------------------|-----------|--------|----------|
| aminoglycoside                      | 1         | 0.57   | 0.73     |
| bacitracin                          | 1         | 0.26   | 0.42     |
| beta_lactam                         | 1         | 0.69   | 0.81     |
| chloramphenicol                     | 1         | 0.29   | 0.45     |
| fosfomycin                          | 1         | 0.42   | 0.6      |
| macrolide-lincosamide-streptogramin | 1         | 0.3    | 0.46     |
| multidrug                           | 0.52      | 0.55   | 0.53     |
| mupirocin                           | 0         | 0      | 0        |
| peptide                             | 1         | 0.06   | 0.12     |
| polymyxin                           | 1         | 0.4    | 0.57     |
| trimethoprim                        | 1         | 1      | 1        |
| quinolone                           | 1         | 0.2    | 0.33     |
| sulfonamide                         | 0         | 0      | 0        |
| tetracycline                        | 0         | 0      | 0        |
| unknown                             | 0         | 0      | 0        |
| avg/total                           | 0.98      | 0.42   | 0.56     |

□

**Table S3:** Prediction performance of the individual ARG categories for the deepARG-LS model and the Best Hit approach using the UNIPROT 70% genes for training and 30% for validation
