# Supplementary material for: DeepARG: a deep learning approach for predicting antibiotic resistance genes from metagenomic data
Source: PubMed Central journal article supplement (PMC5796597; doi:10.1186/s40168-018-0401-z), 2018-02-01
Supplement: 40168_2018_401_MOESM4_ESM.pdf [file 40168_2018_401_MOESM4_ESM.pdf]

|                                          | precision | recall | f1-score |
|------------------------------------------|-----------|--------|----------|
| Mycobacterium tuberculosis-specific Drug | 0         | 0      | 0        |
| Trimethoprim                             | 1         | 0.95   | 0.98     |
| Tunicamycin                              | 0         | 0      | 0        |
| aminocoumarin                            | 0.73      | 0.5    | 0.59     |
| aminoglycoside                           | 0.96      | 0.96   | 0.96     |
| bacitracin                               | 1         | 0.5    | 0.67     |
| beta_lactam                              | 1         | 0.99   | 1        |
| chloramphenicol                          | 0.87      | 0.82   | 0.85     |
| elfamycin                                | 1         | 0.9    | 0.95     |
| fosfomycin                               | 1         | 0.96   | 0.98     |
| fusidic_acid                             | 0.4       | 1      | 0.57     |
| glycopeptide                             | 1         | 0.99   | 0.99     |
| macrolide-lincosamide-streptogramin      | 0.96      | 0.93   | 0.95     |
| multidrug                                | 0.7       | 0.6    | 0.65     |
| peptide                                  | 0.62      | 0.28   | 0.38     |
| quinolone                                | 0.75      | 0.96   | 0.84     |
| rifampin                                 | 0.89      | 1      | 0.94     |
| sulfonamide                              | 1         | 0.93   | 0.96     |
| tetracycline                             | 0.93      | 0.94   | 0.93     |
| thiostrepton                             | 1         | 1      | 1        |
| avg/total                                | 0.94      | 0.93   | 0.93     |

□

**Table S4:** Prediction results of the genes from MEGARes using the deepARG-LS model trained with our database.
